# Supplementary material for: Personalized Psychotherapy for Outpatients with Major Depression and Anxiety Disorders: Transdiagnostic Versus Diagnosis-Specific Group Cognitive Behavioural Therapy
Source: Springer Nature journal article supplement (doi:10.1007/s10608-020-10116-1), 2020-05-26
Supplement: MOESM2 [file 18012232]

## Sheet: Ark1
Appendix B
Demographic and background characteristics of the two groups
	UP	Diagnosis-specific CBT
	(N = 148 )	(N= 143)
	N (%)	N (%)
Aarhus (n = 123)	63 ( 51.22 %)	60 ( 48.78 %)
Copenhagen (n = 107)	54 ( 50.47 %)	53 ( 49.53 %)
Slagelse (n = 61)	31 ( 50.86 %)	30 ( 49.14 %)
Women	99 (66.89 %)	89 (62.24 %)
Age	31.29 (10.56)	33.18 (11.48)
Have a partner	68 (48.23 %)	74 (54.01 %)
Living alone	38 (26.95 %)	29 (20.86 %)
Home-living children	41 (28.87 %)	39 (28.06 %)
Education
Low	38 (26.76 %)	30 (21.47 %)
Medium	58 (40.85 %)	57 (41.30 %)
High	45 (32.39 %)	51 (36.96 %)
Active (in work or education)	52 (41.27 %)	54 (42.52 %)
Smoking	57 (41.61 %)	47 (34.81 %)
Weekly intake of alcohol
< 1 drink	68 (48.23 %)	71 (52.21 %)
1-7 drinks	56 (39.72 %)	54 (39.71 %)
> 7 drinks	17 (12.06 %)	11 (8.09 %)
Known disposition in the family	62 (46.27 %)	68 (52.31 %)
Life events
none	56 (39.72 %)	65 (47.10 %)
1 traumatic life event	40 (28.37 %)	24 (17.39 %)
> 1 traumatic life event	45 (31.91 %)	49 (35.51 %)
This appendix is supplemental material for the paper: Personalized psychotherapy for out-patients with major depression and anxiety disorders:
Transdiagnostic versus diagnosis-specific group cognitive behavioural therapy (submitted to Cognitive Therapy and Research).
Authors: Anita Eskildsena*, Nina Reinholtb,c, Suzanne van Bronswijkd, René B.K. Brunda, Anne B. Christensenc,e,
Morten Hvenegaardb, Mikkel Arendta,f, Anja Alrøa, Stig Poulseng, Nicole K Rosenbergb, Marcus J.H. Huibersh, Sidse Arnfredc,e
*Corresponding author: Anita Eskildsen, PhD, Department of Affective Disorders, Aarhus University Hospital,
Palle Juul-Jensens Boulevard 175, 8200 Aarhus N, Denmark. E-mail: anita.e@rm.dk. Tel: +45 24605795.
aDepartment of Affective Disorders, Aarhus University Hospital, Denmark
bMental Health Services in Capital Region of Denmark, Denmark
cDepartment of Clinical Medicine, Faculty of Health and Medical Science, University of Copenhagen, Denmark
dDepartment of Clinical Psychological Science, Faculty of Psychology and Neuroscience, Maastricht University, Maastricht, the Netherlands
ePsychiatry West, Region Zealand Mental Health Service, Denmark
fDepartment of Clinical Medicine, Aarhus University, Aarhus, Denmark
gDepartment of Psychology, University of Copenhagen, Denmark
hDepartment of Clinical Psychology, Vrije Universiteit Amsterdam, The Netherlands
