# Supplementary material for: Personalized Psychotherapy for Outpatients with Major Depression and Anxiety Disorders: Transdiagnostic Versus Diagnosis-Specific Group Cognitive Behavioural Therapy
Source: Springer Nature journal article supplement (doi:10.1007/s10608-020-10116-1), 2020-05-26
Supplement: MOESM3 [file 18012232]

# Appendix C*

## Imputation method: Not imputing the outcome

To assess the influence of our imputation method, we repeated the analyses with a dataset where WHO-5 was not imputed to assess potential differences.

PAI ANALYSES

Variable selection

*Random forest variable selection*

| Primary analysis | Sensitivity analyses |
| --- | --- |
| **BDI-II** | **BDI-II** |
| **Age** | **Age** |
| **Detachment (PID-5)** | **Detachment (PID-5)** |
| Positive affect schedule (PANAS) |  |
| Duration of disorder |  |

**Bold font indicates that the variables were identified in both methods**

#### Robustness of variables selected

Similar to the analyses without imputation of WHO-5, no moderators were selected in more than 60 % the bootstrap samples in the imputed data.

Prognostic Index (PI) Analyses

Variable selection

*Random forest variable selection*

| **Primary analysis** | **Sensitivity analyses** |
| --- | --- |
| Beck depression inventory (BDI-II) | **Beck depression inventory (BDI-II)** |
| **Detachment (PID-5)** | **Detachment (PID-5)** |
| **Level of personality functioning (LPFS-BF)** | **Level of personality functioning (LPFS-BF)** |
| **Positive affect schedule (PANAS)** | **Positive affect schedule (PANAS)** |
| **Duration of disorder** | **Duration of disorder** |
| **Perseverative thinking (PTQ)** | **Perseverative thinking (PTQ)** |
| **Cognitive reappraisal (ERQ)** | **Cognitive reappraisal (ERQ)** |
| **Emotion regulation (ERSQ)** | **Emotion regulation (ERSQ)** |
| **Psychoticism (PID-5)** | **Psychoticism (PID-5)** |
| **Disinhibition (PID-5)** | **Disinhibition (PID-5)** |
| **Hamilton anxiety rating scale (HAM-A6)** | **Hamilton anxiety rating scale (HAM-A6)** |
| Certainty about mental states (RFQ) |  |
| Expressive suppression |  |
|  | Life event checklist |
|  | Negative affect (PID-5) |
|  | Age |
|  |  |
|  |  |
|  |  |
|  |  |

##### Robustness of variables selected

*BootstepAIC: variables* selected more than 60% of the bootstrap samples

| **Primary analysis** | **Sensitivity analyses** |
| --- | --- |
| **Duration of disorder** | **Duration of disorder** |
| **Positive affect schedule (PANAS)** | **Positive affect schedule (PANAS)** |
| Detachment (PID-5) |  |
| Cognitive reappraisal (ERQ) |  |

##### **Interpretation**

Both duration of disorder and the positive affect schedule (PANAS) were selected in both analysis, however Detachment (PID-5) and Cognitive Reappraisal (ERQ) were only selected when imputing WHO-5 before running the analyses. Nevertheless, the final PI model incorporating the two or four predictors had equal predictive accuracy (r=0.18).

## Site held-out validation of the PI model

To test the generalizability of our variables selection method, the sample was divided in site 2 and the remaining sites (site 1 and 3). Then a model-based recursive partitioning method was used to find important variables in each site to acquire an indication of the generalizability of the predictors.

Variable selection

*Random forest variable selection*

| **Site 1/3** | Site 2 |
| --- | --- |
| **Emotion regulation (ERSQ)**  **Perseverative Thinking (PTQ)**  **Depression severity (BDI-II)** | **Emotion regulation (ERSQ)**  **Perseverative Thinking (PTQ)**  **Depression severity (BDI-II)** |
| Concentration difficulties  Primary diagnosis  Antagonism (PID-5)  Duration of disorder  Certainty about mental states (RFQ) |  |
|  | Psychoticism (PID-5)  Disinhibition (PID-5)  Positive Affect Schedule (PANAS)  Level of Personality Functioning (LPFS-BF)  Anxiety severity (HAM-A6)  Detachment (PID-5)  Cognitive reappraisal (ERQ)  Expressive suppression (ERQ) |

Robustness of variables selected

*BootstepAIC: variables* selected more than 60% of the bootstrap samples

| **Site 1/3** | **Site 2** |
| --- | --- |
| **Emotion regulation (ERSQ)** | **Emotion regulation (ERSQ)** |
| Certainty about mental states (RFQ)  Duration of disorder  Concentration difficulties  Depression severity (BDI-II) |  |
|  | Positive Affect Schedule (PANAS) z_ptq_total  Cognitive reappraisal (ERQ)  Detachment (PID-5) |

Only emotion regulation of the site specific variables were selected in both sites, which indicate a low generalizability of the PI model.

## Supplementary analyses with change (from pre- to post-treatment) as outcome variable

Prognostic Index (PI) Analyses

Variable selection

*Random forest variable selection*

| **Primary analysis (slope)** | **Change as outcome** |
| --- | --- |
| Beck depression inventory (BDI-II) | **Beck depression inventory (BDI-II)** |
| **Duration of disorder** | **Duration of disorder** |
| **Detachment (PID-5)** | **Detachment (PID-5)** |
| **Level of personality functioning (LPFS-BF)** | **Level of personality functioning (LPFS-BF)** |
| **Positive affect schedule (PANAS)** | **Positive affect schedule (PANAS)** |
| **Perseverative thinking (PTQ)** | **Perseverative thinking (PTQ)** |
| **Emotion regulation (ERSQ)** | **Emotion regulation (ERSQ)** |
| **Psychoticism (PID-5)** | **Psychoticism (PID-5)** |
| **Cognitive reappraisal (ERQ)** | **Cognitive reappraisal (ERQ)** |
| **Certainty about mental states (RFQ)** | **Certainty about mental states (RFQ)** |
| Hamilton anxiety rating scale (HAM-A6) |  |
| Disinhibition (PID-5) |  |
| Expressive suppression |  |
|  | Antagonism (PID-5) |

##### Robustness of variables selected

*BootstepAIC: variables* selected more than 60% of the bootstrap samples

| **Primary analysis (slope)** | **Change as outcome** |
| --- | --- |
| **Positive affect schedule (PANAS)** | **Positive affect schedule (PANAS)** |
| **Duration of disorder** | **Duration of disorder** |
| **Detachment (PID-5)** | **Detachment (PID-5)** |
| Cognitive reappraisal (ERQ) |  |

##### **Predictive accuracy of PI model with pre-post change as outcome**

The correlation between the predicted change score and the observed change score was 0.29, p<0.000

The mean difference between the predicted and observed change score was -0.04 (CI: -2.17,2.09), p = 0.97.

## Influence of hyperparameter on the PI model

Hyperparameter selection (i.e. parameters which prior to running the model is selected to identify how the model is structured) can potentially have a great influence on the results of model-based recursive partitioning methods (Strobl et al. 2009). Therefore, we assessed the influence of number of randomly preselected predictor variables and minimum samples remaining at each node before stopping the split. This was done by fixing the other hyperparameters except the one of interest and changing this to five above or below the usual value of 10. We kept the random forest to 10.000 samples.

**Mtry:** The number of randomly preselected predictor variables

**Minsplit:** Minimum samples remaining at each node before stopping the split

| **Primary analyses** |  |  |  |  |
| --- | --- | --- | --- | --- |
| **Mtry: 10** | **Mtry 5** | **Mtry 15** | **Mtry 10** | **Mtry 10** |
| **Minsplit: 10** | **Minsplit 10** | **Minsplit 10** | **Minsplit 10** | **Minsplit 15** |
| **BDI-II**  **Psychoticism (PID-5)**  **Emotion regulation (ERSQ)**  **Cognitive reappraisal (ERQ)**  **Detachment (PID-5)**  **Level of personality functioning (LPFS-BF) Positive affect schedule (PANAS)**  Duration of disorder Perseverative thinking (PTQ)  Certainty about mental states (RFQ)  Expressive suppression (ERQ) | **BDI-II**  **Psychoticism (PID-5)**  **Emotion regulation (ERSQ)**  **Cognitive reappraisal (ERQ)**  **Detachment (PID-5)**  **Level of personality functioning (LPFS-BF) Positive affect schedule (PANAS)**  Duration of disorder Perseverative thinking (PTQ)  **Certainty about mental states (RFQ)**  **Expressive suppression (ERQ)** | **BDI-II**  **Psychoticism (PID-5)**  **Emotion regulation (ERSQ)**  **Cognitive reappraisal (ERQ)**  **Detachment (PID-5)**  **Level of personality functioning (LPFS-BF) Positive affect schedule (PANAS)**  **Duration of disorder Perseverative thinking (PTQ)**  **Certainty about mental states (RFQ)**  **Expressive suppression (ERQ)** | **BDI-II**  **Psychoticism (PID-5)**  **Emotion regulation (ERSQ)**  **Cognitive reappraisal (ERQ)**  **Detachment (PID-5)**  **Level of personality functioning (LPFS-BF) Positive affect schedule (PANAS)**  **Duration of disorder Perseverative thinking (PTQ)**  **Certainty about mental states (RFQ)**  **Expressive suppression (ERQ)** | **BDI-II**  **Psychoticism (PID-5)**  **Emotion regulation (ERSQ)**  **Cognitive reappraisal (ERQ)**  **Detachment (PID-5)**  **Level of personality functioning (LPFS-BF) Positive affect schedule (PANAS)**  **Duration of disorder Perseverative thinking (PTQ)**  **Certainty about mental states (RFQ)**  **Expressive suppression (ERQ)** |
| Hamilton anxiety rating scale (HAM-A6)  Disinhibition (PID-5) | Hamilton anxiety rating scale (HAM-A6)  Disinhibition (PID-5) | Hamilton anxiety rating scale (HAM-A6) | Hamilton anxiety rating scale (HAM-A6)  Disinhibition (PID-5)  Concentration difficulties | Disinhibition (PID-5) |

Eleven variables of the variables chosen in the primary analyses were selected in all analyses irrespective of hyperparameters chosen and two were only selected in three of the four the analyses with different parameters.

*This is supplemental material for the paper Personalized psychotherapy for out-patients with major depression and anxiety disorders: Transdiagnostic versus diagnosis-specific group cognitive behavioural therapy (submitted to Cognitive Therapy and Research).

Authors: Anita Eskildsena*, Nina Reinholtb,c, Suzanne van Bronswijkd, René B.K. Brunda, Anne B. Christensenc,e, Morten Hvenegaardb, Mikkel Arendta,f, Anja Alrøa, Stig Poulseng, Nicole K Rosenbergb, Marcus J.H. Huibersh, Sidse Arnfredc,e

*Corresponding author: Anita Eskildsen, PhD, Department of Affective Disorders, Aarhus University Hospital, Palle Juul-Jensens Boulevard 175, 8200 Aarhus N, Denmark. E-mail: anita.e@rm.dk. Tel: +45 24605795.

aDepartment of Affective Disorders, Aarhus University Hospital, Denmark

bMental Health Services in Capital Region of Denmark, Denmark

cDepartment of Clinical Medicine, Faculty of Health and Medical Science, University of Copenhagen, Denmark

dDepartment of Clinical Psychological Science, Faculty of Psychology and Neuroscience, Maastricht University, Maastricht, the Netherlands

ePsychiatry West, Region Zealand Mental Health Service, Denmark

fDepartment of Clinical Medicine, Aarhus University, Aarhus, Denmark

gDepartment of Psychology, University of Copenhagen, Denmark

hDepartment of Clinical Psychology, Vrije Universiteit Amsterdam, The Netherlands
